# Supplementary material for: Epithelial and stromal circadian clocks are inversely regulated by their mechano-matrix environment
Source: PubMed Central journal article supplement (PMC5897718; doi:10.1242/jcs.208223), 2018-03-01
Supplement: joces-131-208223-s1.pdf [file joces-131-208223-s1.pdf]

**Table S1. Gene expression in MEC cells cultured in different mechano-physical microenvironments.**

| GeneName  | Description                                                                                                 | P value | Log <sub>2</sub> FC (3D Matrigel/<br>2D plastic) |
|-----------|-------------------------------------------------------------------------------------------------------------|---------|--------------------------------------------------|
| NM_008904 | Mus musculus peroxisome proliferative activated receptor, gamma, coactivator 1 alpha (PGC1 $\alpha$ ), mRNA | 0.0000  | 2.28                                             |
| NM_011281 | Mus musculus RAR-related orphan receptor gamma (ROR $\gamma$ ), mRNA                                        | 0.0000  | 1.98                                             |
| NM_011066 | Mus musculus period homolog 2 (Drosophila) (Per2), mRNA                                                     | 0.0000  | 1.76                                             |
| NM_011146 | Mus musculus peroxisome proliferator activated receptor gamma (Ppar $\gamma$ ), mRNA                        | 0.0000  | 1.74                                             |
| AK041047  | Mus musculus similar to Nuclear Receptor Subfamily 1, Group D, Member 1 homolog (Nr1d1), mRNA               | 0.0084  | 1.22                                             |
| NM_007771 | Mus musculus cryptochrome 1 (photolyase-like) (Cry1), mRNA                                                  | 0.0000  | 0.75                                             |
| NM_013646 | Mus musculus RAR-related orphan receptor alpha (ROR $\alpha$ ), mRNA                                        | 0.0007  | 0.61                                             |
| NM_007489 | Mus musculus aryl hydrocarbon receptor nuclear translocator-like (Arntl), mRNA                              | 0.0044  | 0.54                                             |

Selected clock-related genes from a set of upregulated genes in unsynchronized primary MECs cultured in Matrigel compared to plastic. Data were obtained from Agilent mouse oligo microarray, and are displayed as log<sub>2</sub> fold change of expression and significance value.

**Table S2: Antibodies used in this study.**

| Antibody     | Recognises          | Tag       | Dilution                | Supplier     | Cat Number |
|--------------|---------------------|-----------|-------------------------|--------------|------------|
| Anti-CD45    | Ly-5                | APC-Cy7   | 5 $\mu$ l/million cells | BD Pharmigen | 557659     |
| Anti-CD31    | PECAM-1             | Biotin    | 5 $\mu$ l/million cells | BD Pharmigen | 558737     |
| Anti-Ter-119 | Ly-76               | Biotin    | 5 $\mu$ l/million cells | BD Pharmigen | 553672     |
| Anti-BP-1    | Ly-51               | Biotin    | 5 $\mu$ l/million cells | BD Pharmigen | 553159     |
| Streptavidin | Biotin              | APC-Cy7   | 5 $\mu$ l/million cells | BD Pharmigen | 554063     |
| Anti-CD326   | EpCAM               | APC       | 5 $\mu$ l/million cells | eBioscience  | 17-5791    |
| CD49f        | Integrin $\alpha$ 6 | eFluor450 | 5 $\mu$ l/million cells | eBioscience  | 48-0495    |

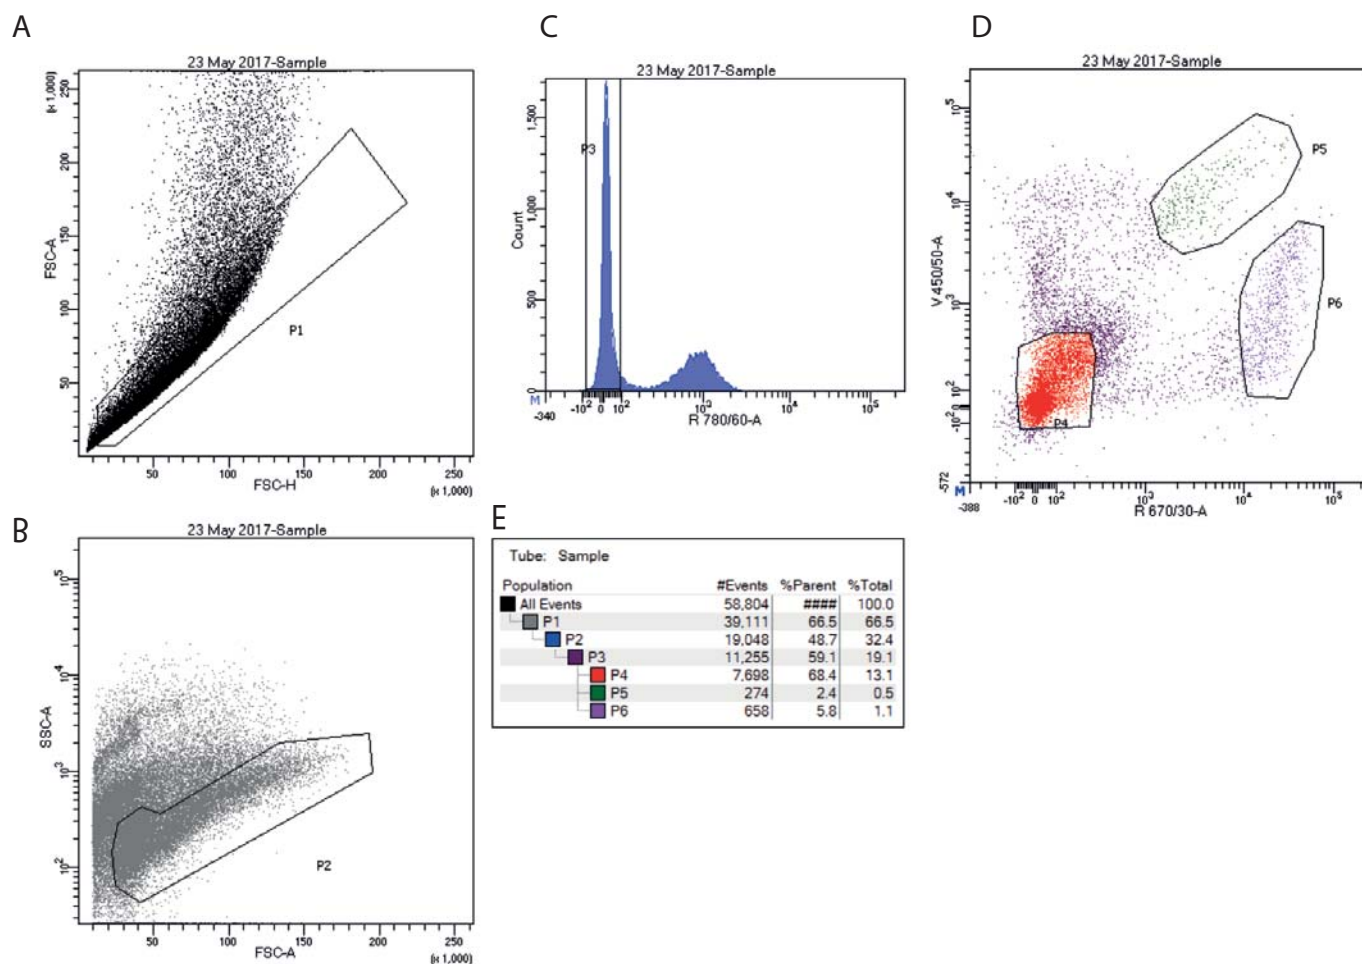

**Fig. S1. Sorting cascade for isolating mammary fibroblasts.**

Live, single cells were negatively sorted against a cocktail of antibodies to remove endothelial, immune and hematopoietic cells. Negative cells were then sorted against EpCAM and CD49f. CD49f- and EpCAM-low cells form the putative mammary fibroblast population.

A-B) Forward and side scatter plots with gates set to pull out single, live cells.

C) Staining with lineage cocktail reveals an unstained population of fibroblasts and epithelia.

D) Mammary fibroblasts stain negatively for CD49f and EpCAM.

E) Number of cells within a population expressed as a percentage of their parent population and total cells.

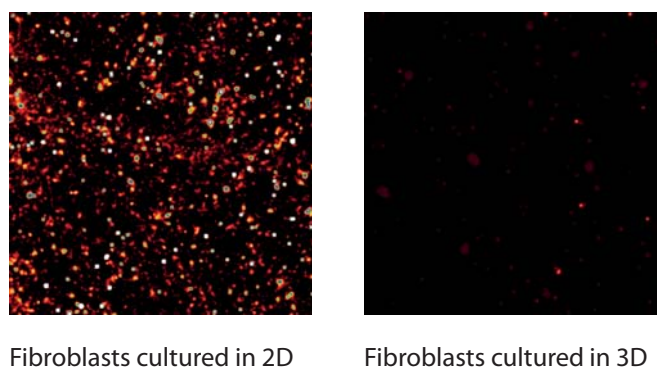

**Fig. S2. Stiffness-dependent circadian clocks in mammary fibroblasts.**

Bioluminescence imaging of PER2::Luc oscillation of mammary fibroblasts cultured under 2D (left) and 3D (right) conditions (see also Movie 1 and Movie 2, respectively). Shown are stills of Movie 1 and 2, with the images at brightest luminescence. The movies were reanalysed using software generated by Dr Egor Zindy at the University of Manchester (<https://github.com/zindy/libatrous>), and displayed using false colours (ImageJ "iman" look-up table).

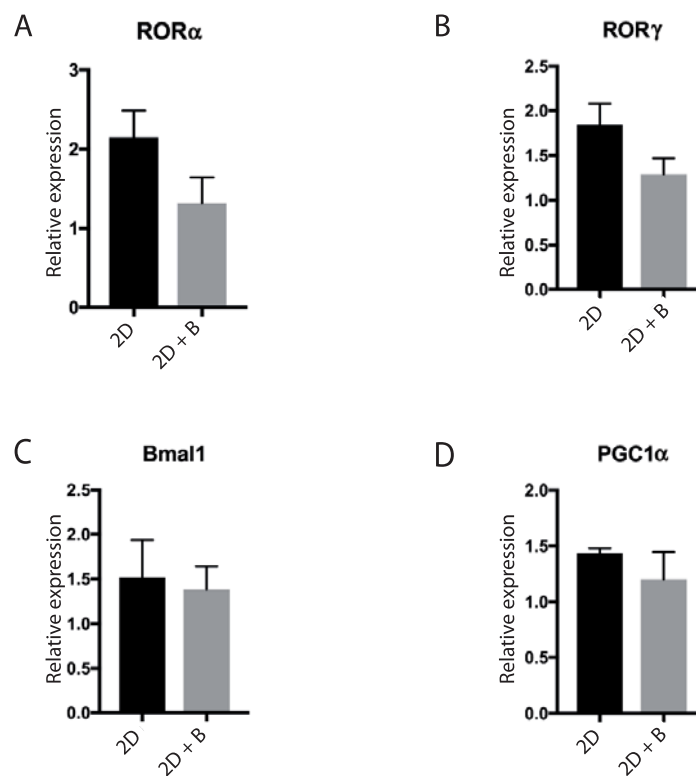

**Fig. S3. Mechano-response of circadian clock genes mediated by the actin cytoskeleton in mammary fibroblasts.**

A-D) Treating unsynchronised MFs in 2D for 2 hours with 10  $\mu$ M Blebbistatin:

A) ROR $\alpha$

B) ROR $\gamma$

C) Bmal1

D) PGC1 $\alpha$

(Student's t-test,  $p < 0.05$ , Mean+s.e.m.)

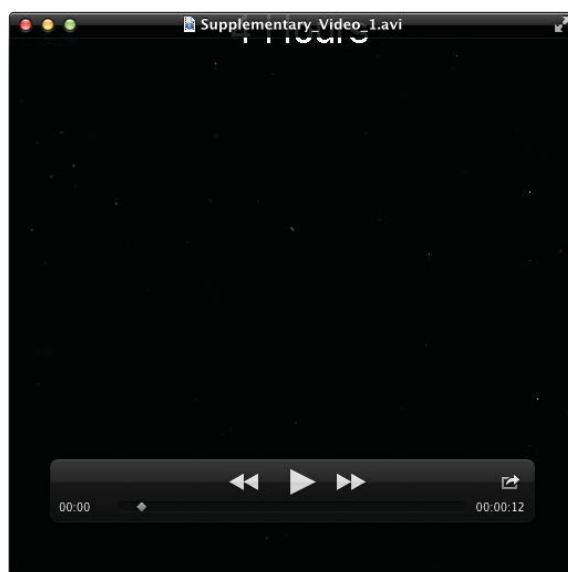

**Movie 1. Stiffness-dependent circadian clocks in mammary fibroblasts; fibroblasts cultured in 2D (see Fig. S2).**

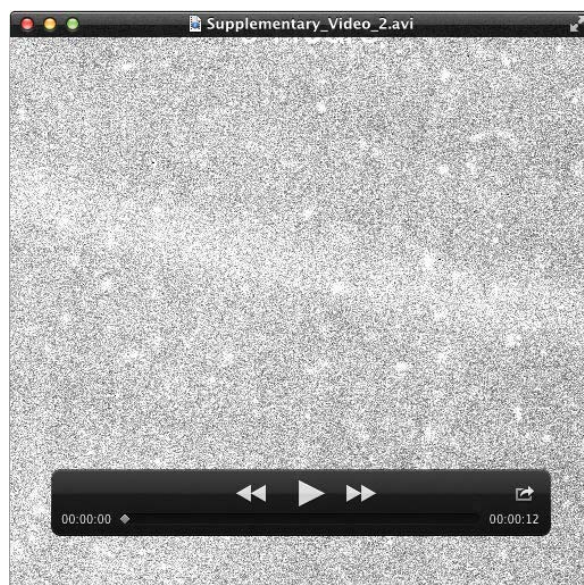

**Movie 2. Stiffness-dependent circadian clocks in mammary fibroblasts; fibroblasts cultured in 3D (see Fig. S2).**

Real-time bioluminescence imaging of PER2::Luc oscillation of mammary fibroblasts cultured under 2D (Movie 1) and 3D (Movie 2) conditions. Due to the weak bioluminescence emission in 3D, the images were reanalysed in Fig S2.
